# Supplementary material
Source: PubMed Central journal article supplement (PMC3712641)

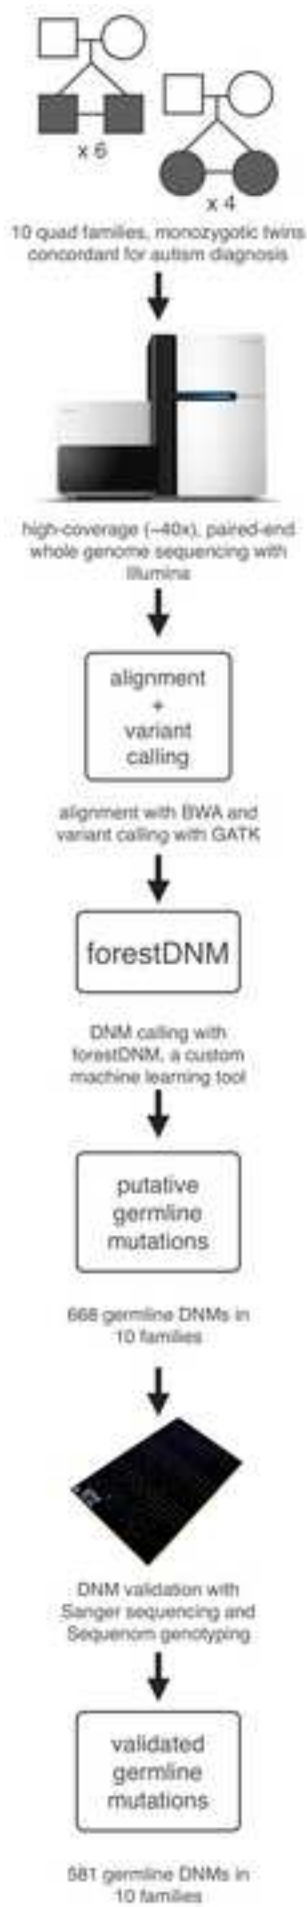

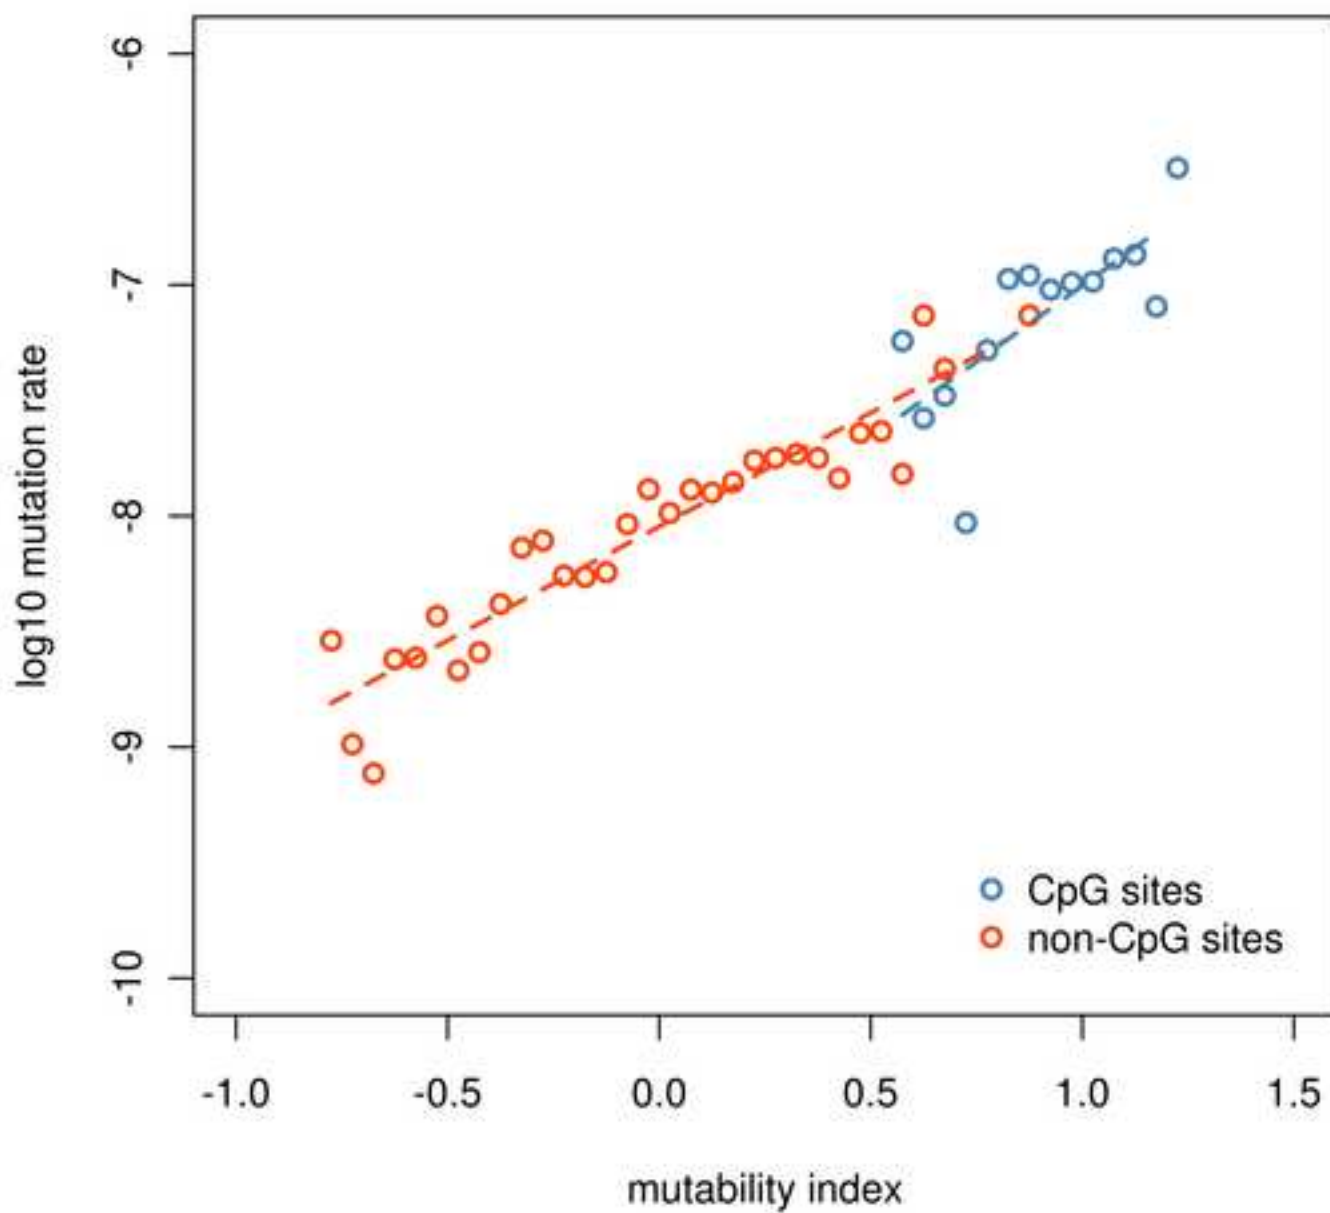

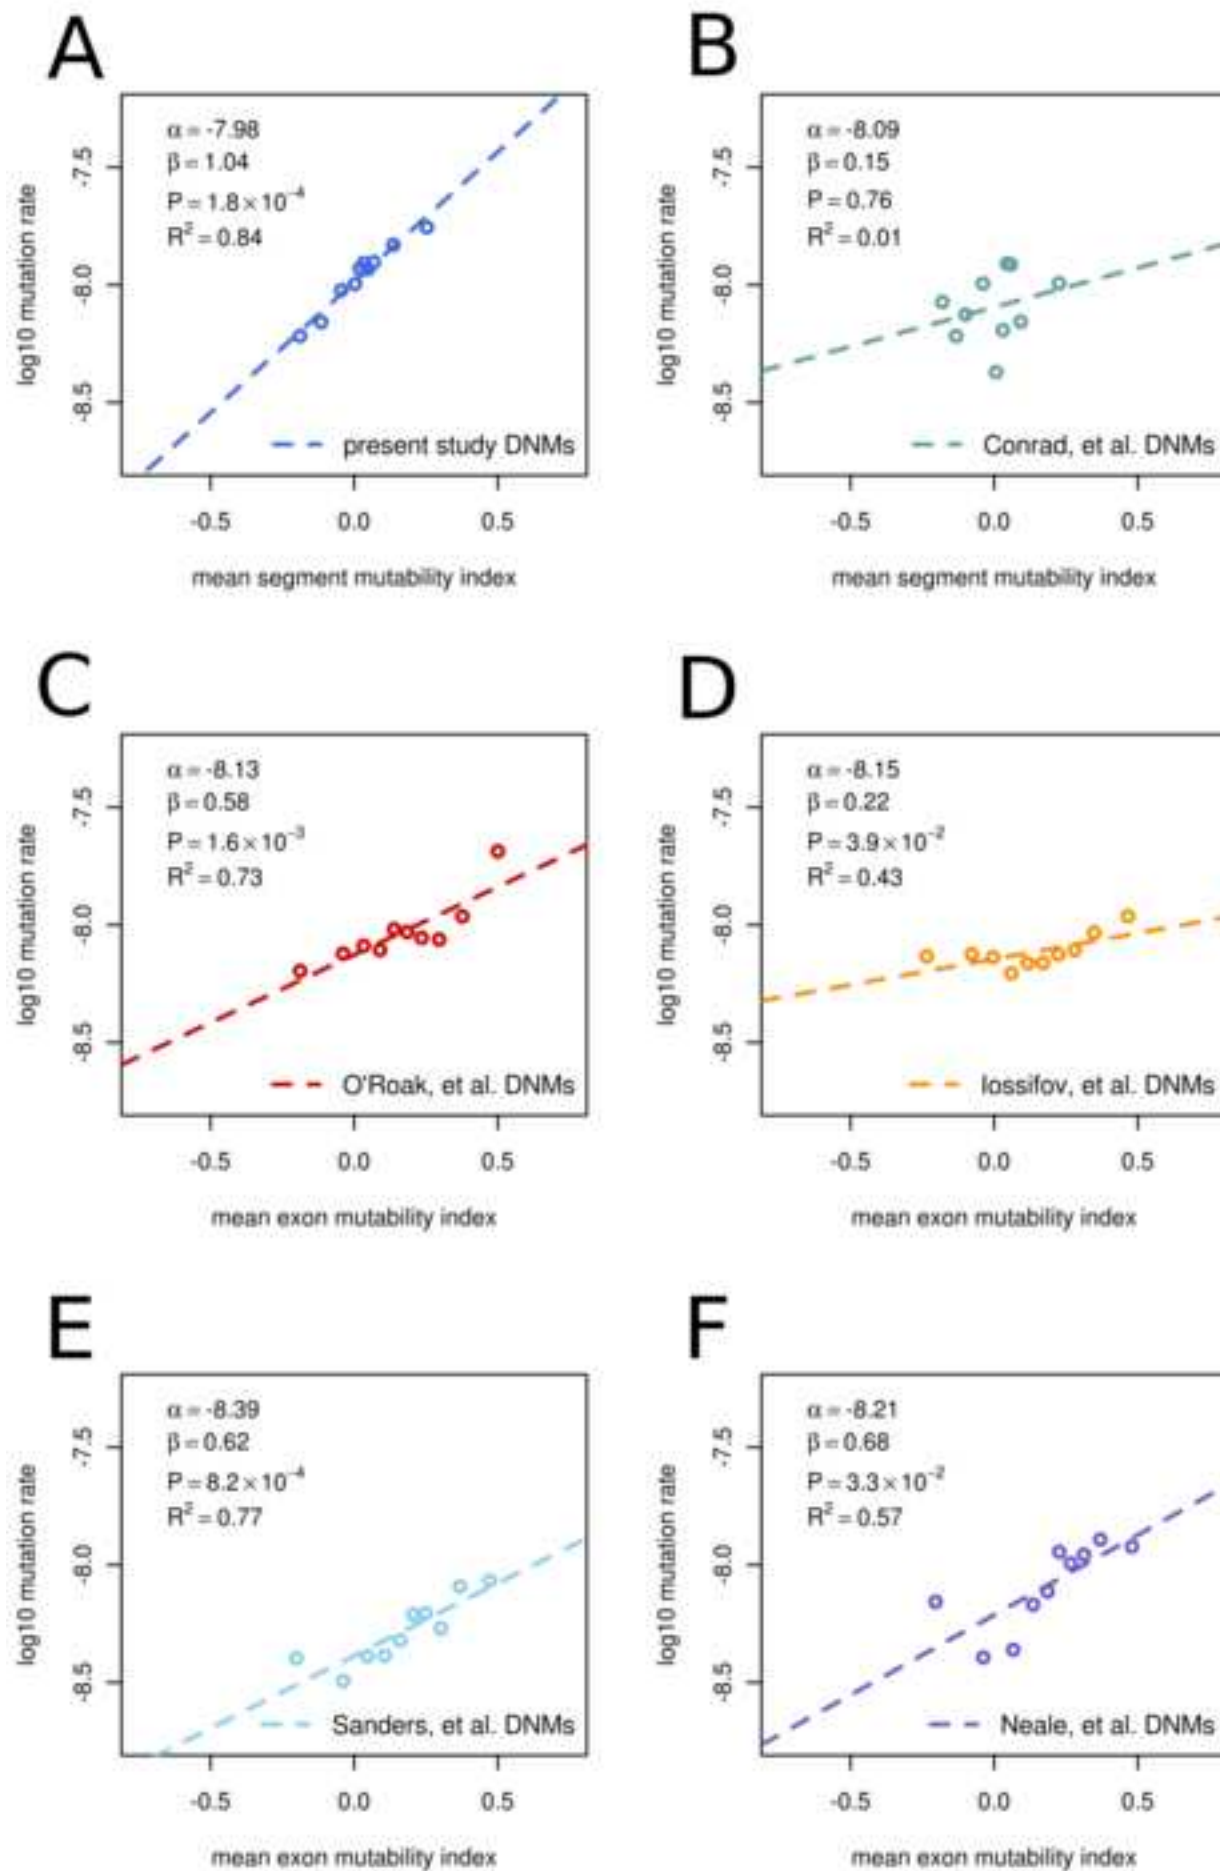

Supplemental Figure 4

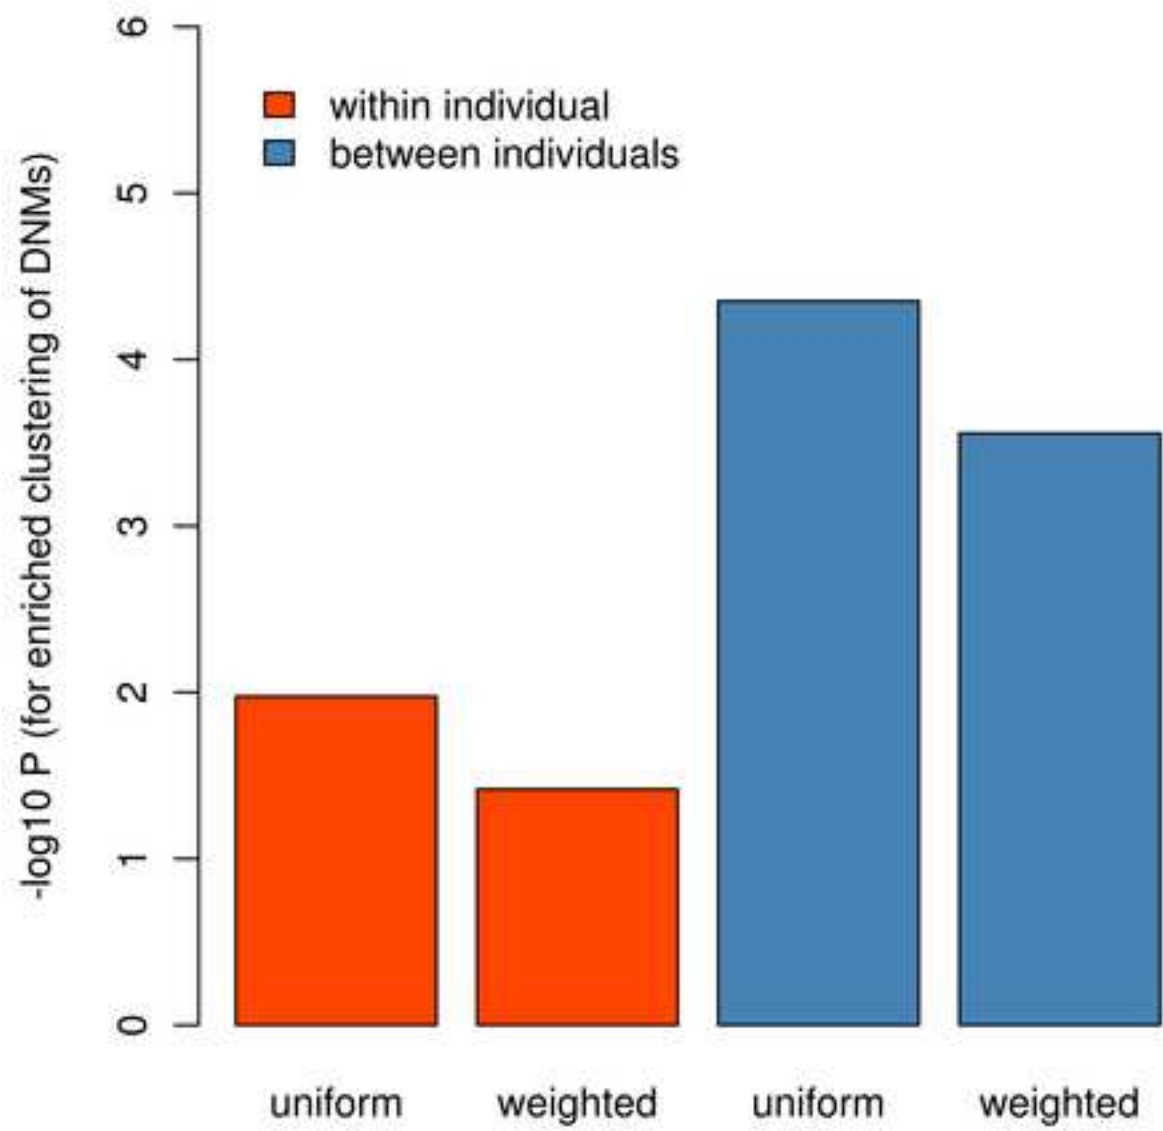

Supplemental Figure 5

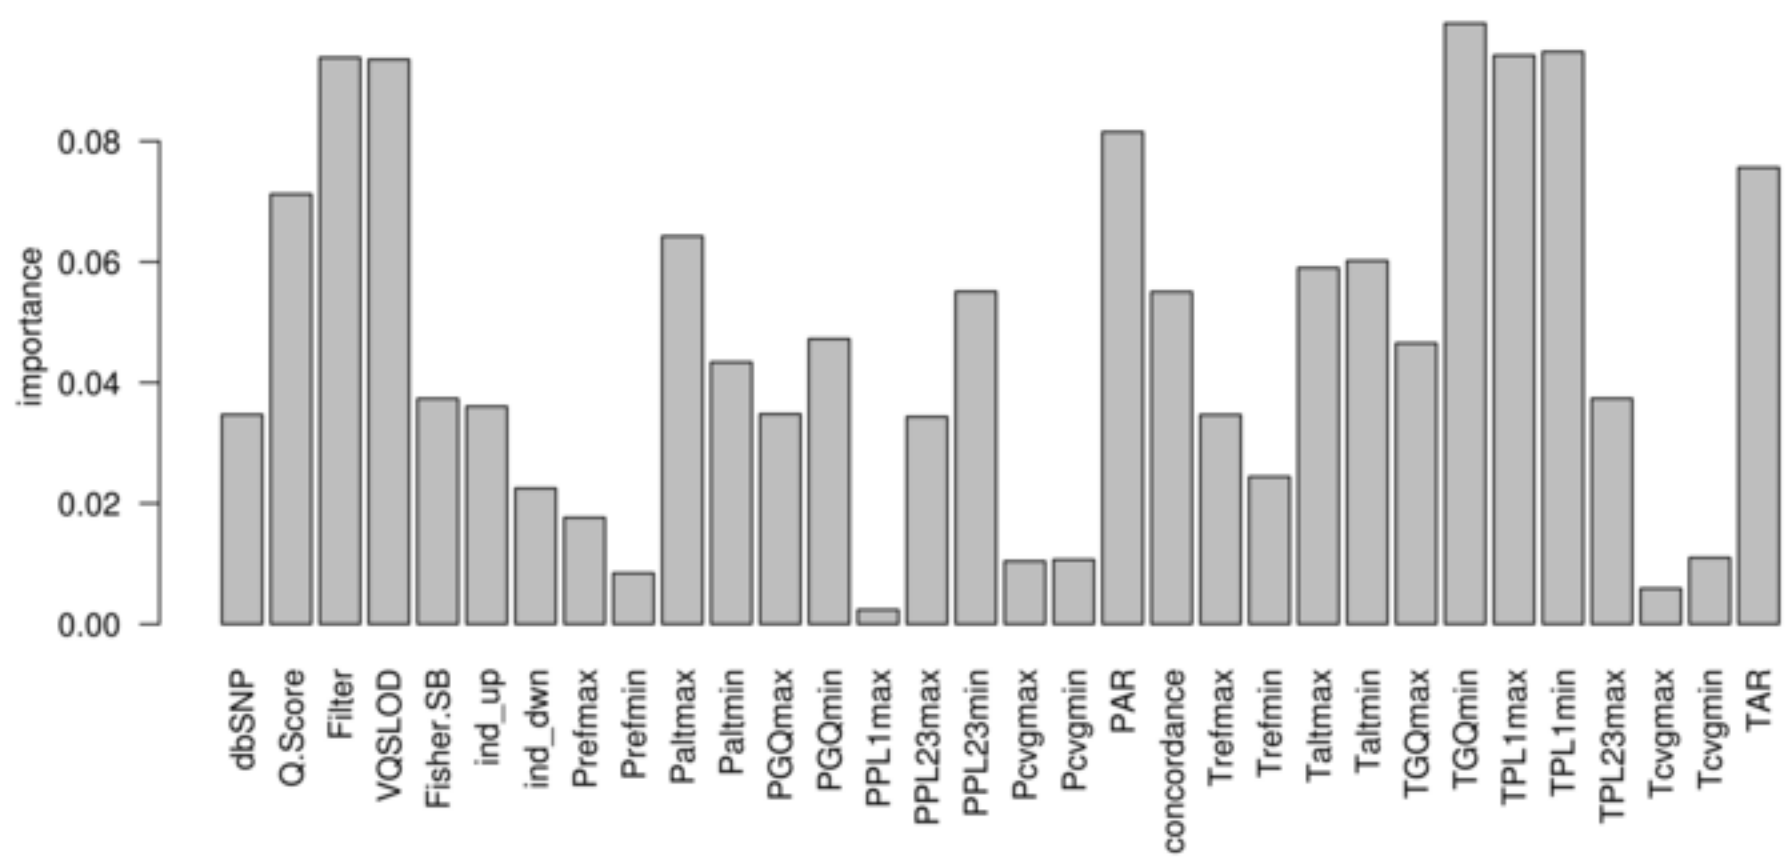

Supplemental Figure 6

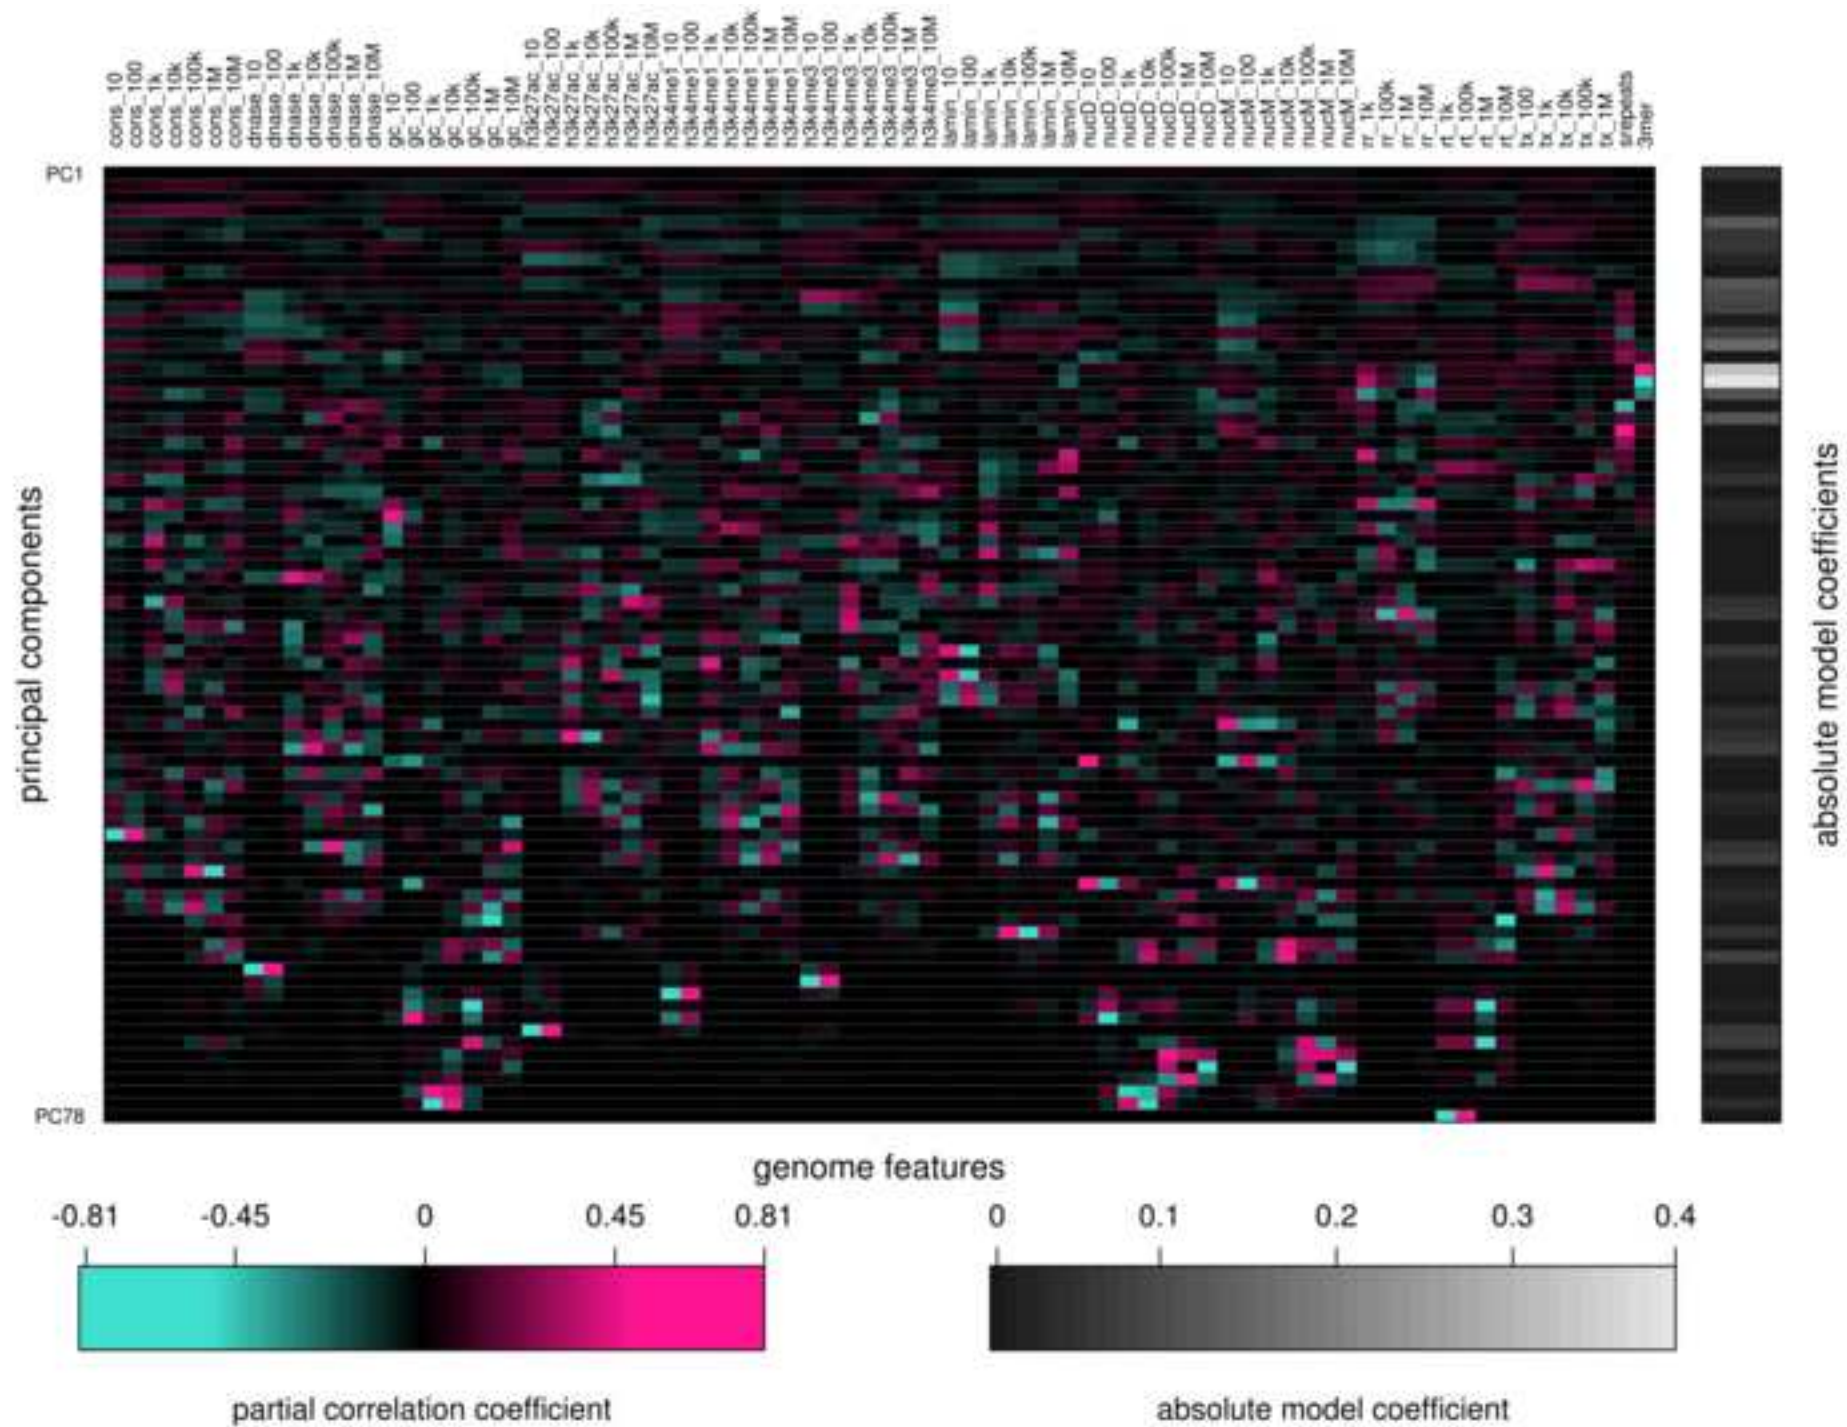

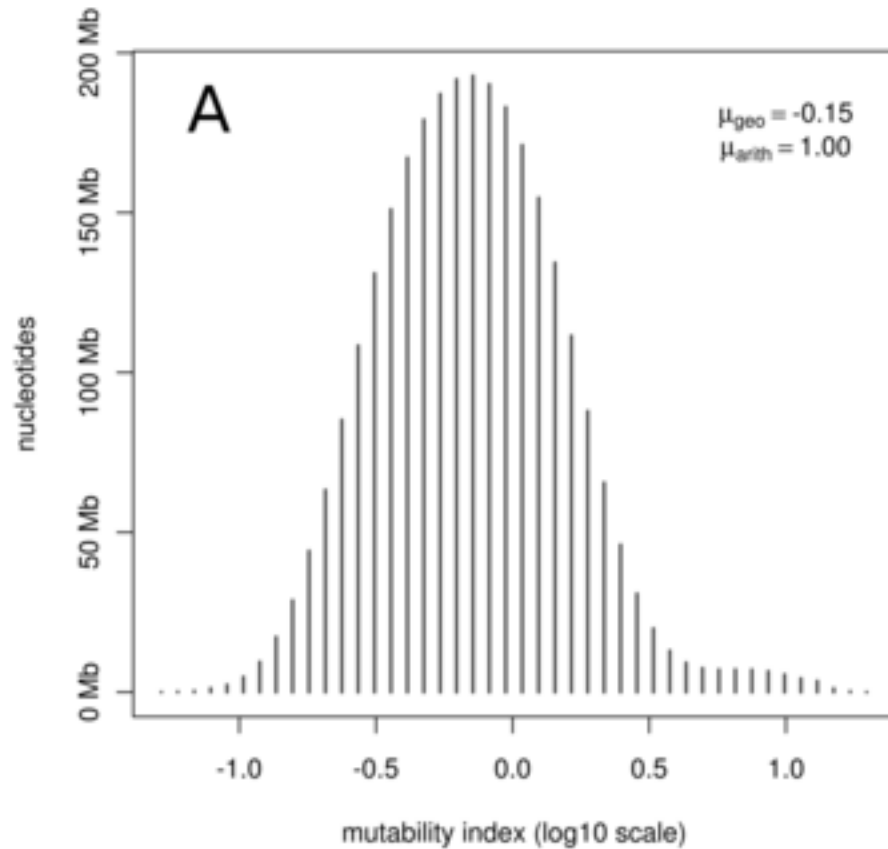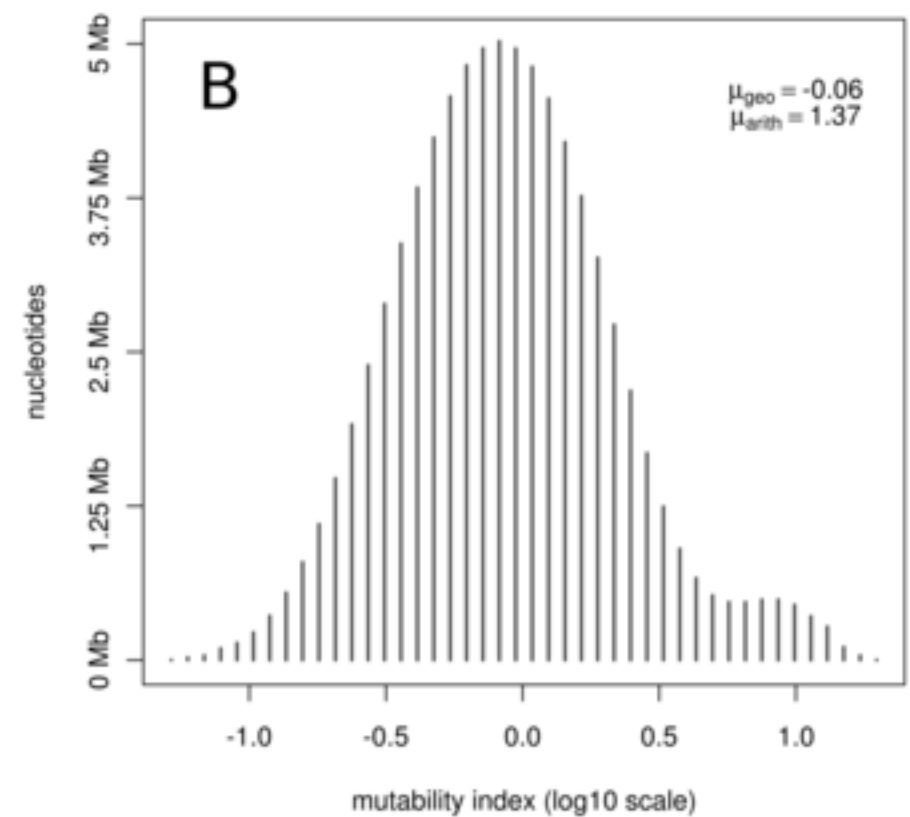

Supplement: NIHMS427705-supplement-08.pdf [file NIHMS427705-supplement-08.pdf]
